# Supplementary material for: Robust, universal biomarker assay to detect senescent cells in biological specimens
Source: PubMed Central journal article supplement (PMC5242262; doi:10.1111/acel.12545), 2016-11-17

# Suppl Fig 1

## a. Chemical synthesis of commercial SBB dye

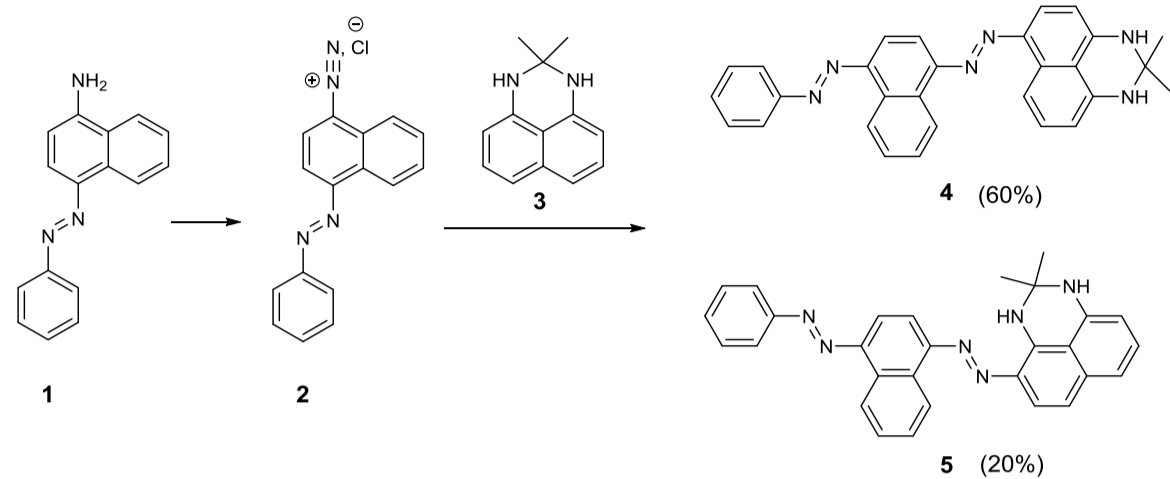

## b. Non-homogeneous chemical composition of commercial SBB dye as revealed by HPLC

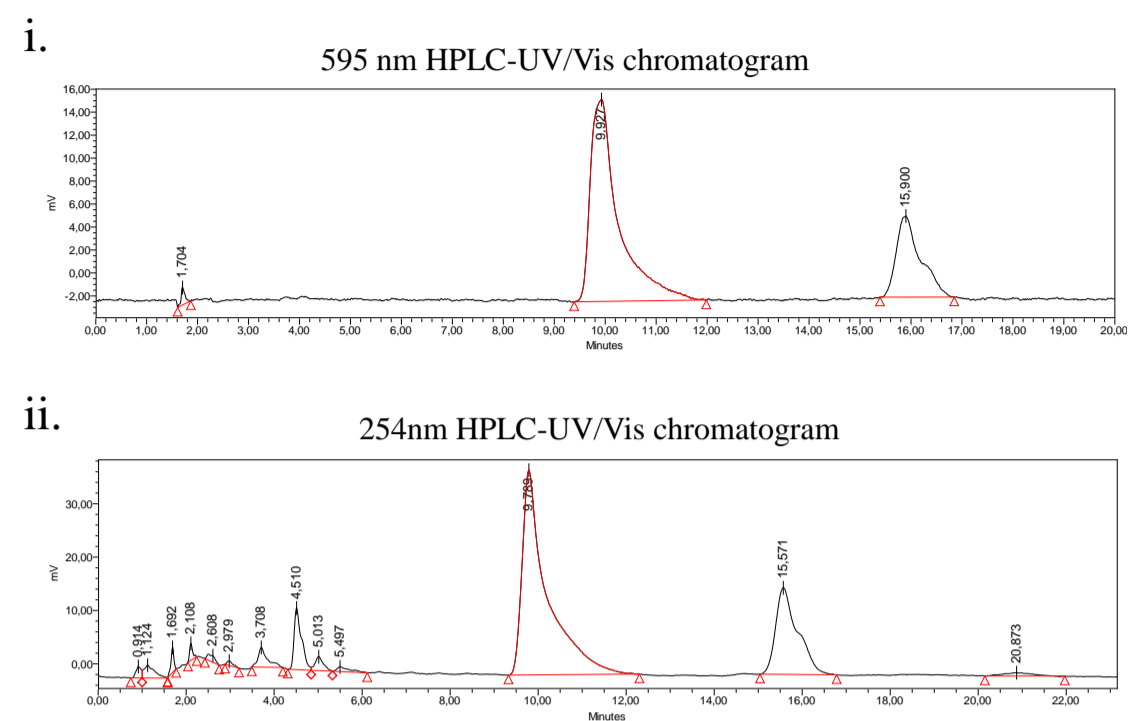

| peak | Retention Time | Area   | % Area |
|------|----------------|--------|--------|
| 1    | 1,704          | 8116   | 0,89   |
| 2    | 9,927          | 675963 | 73,72  |
| 3    | 15,900         | 232853 | 25,39  |

| peak | Retention Time | Area    | % Area |
|------|----------------|---------|--------|
| 1    | 0,914          | 17583   | 0,71   |
| 2    | 1,124          | 40700   | 1,65   |
| 3    | 1,692          | 21797   | 0,89   |
| 4    | 2,108          | 15302   | 0,62   |
| 5    | 2,608          | 14686   | 0,60   |
| 6    | 2,979          | 7767    | 0,32   |
| 7    | 3,708          | 54800   | 2,23   |
| 8    | 4,510          | 134893  | 5,48   |
| 9    | 5,013          | 34642   | 1,41   |
| 10   | 5,497          | 18429   | 0,75   |
| 11   | 9,789          | 1509518 | 61,32  |
| 12   | 15,571         | 561857  | 22,82  |
| 13   | 20,873         | 29783   | 1,21   |

## c. Non-homogeneous chemical composition of commercial SBB dye as revealed by NMR

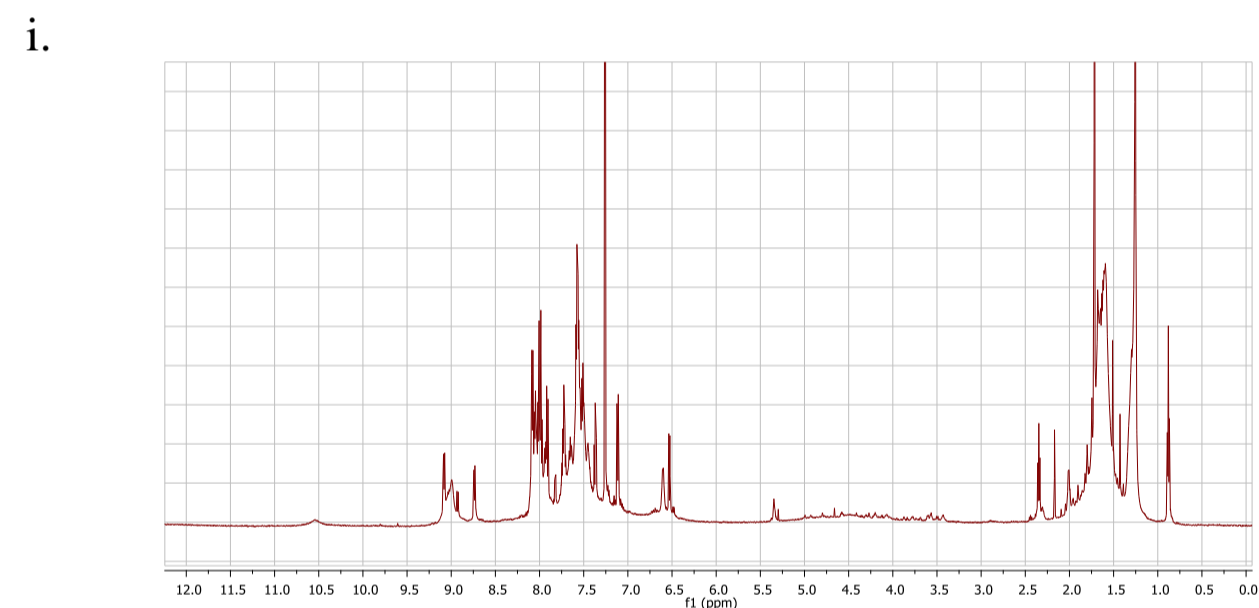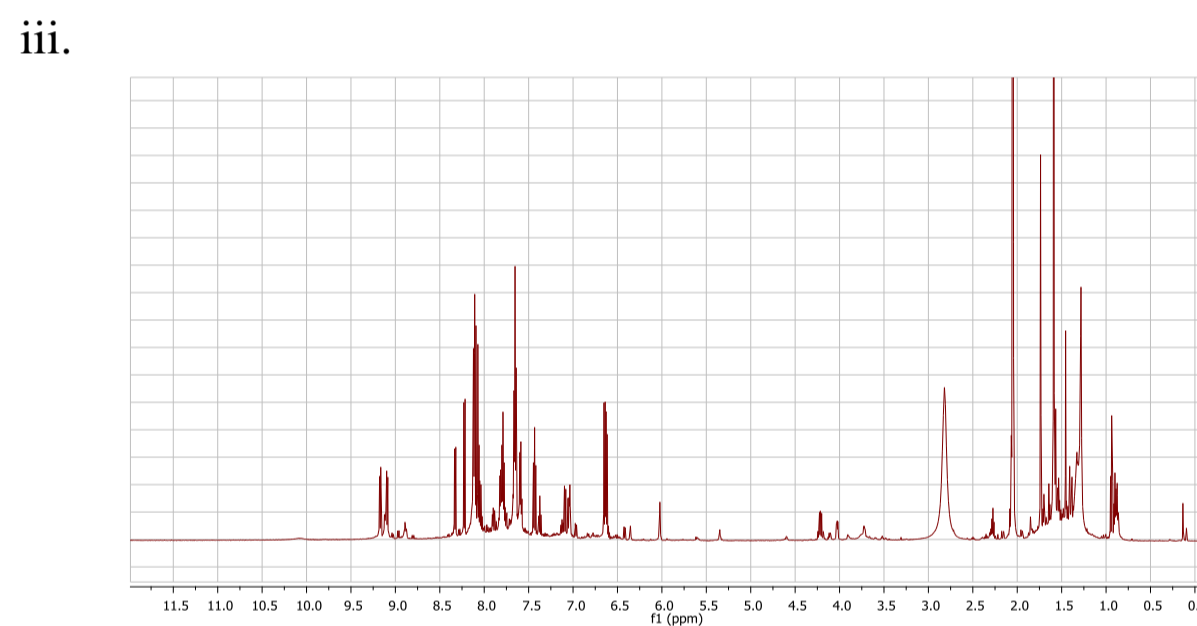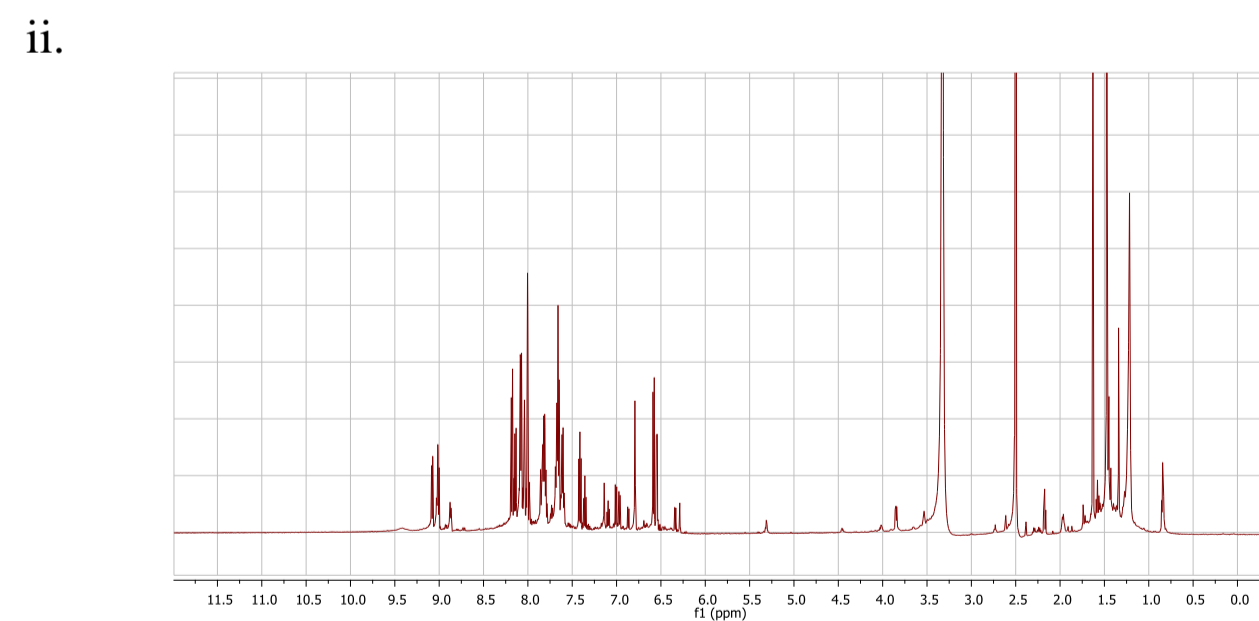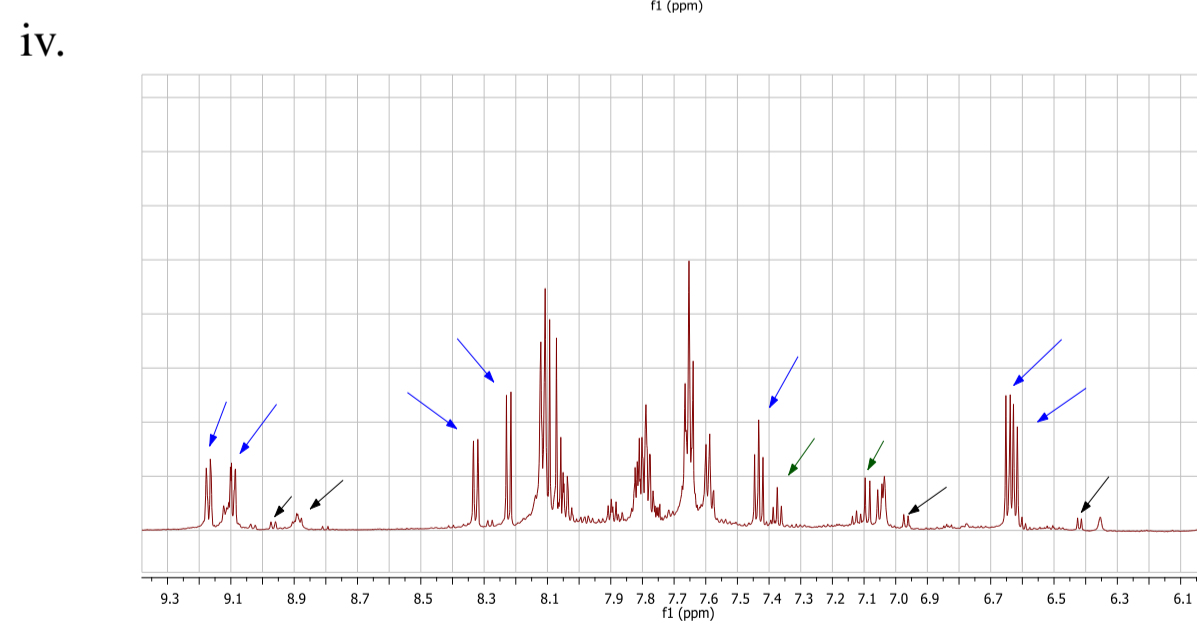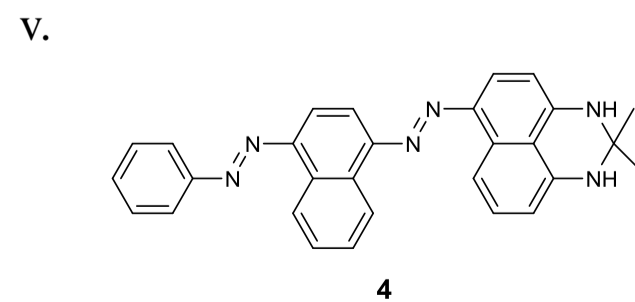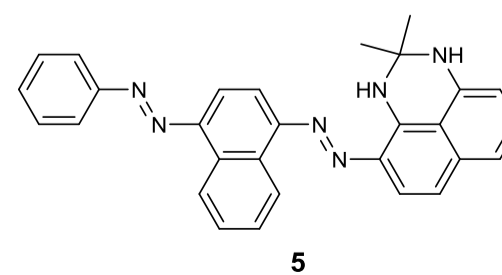

Supplement: ACEL-16-192-s001.pdf [file ACEL-16-192-s001.pdf]
