# Supplementary material for: Robust, universal biomarker assay to detect senescent cells in biological specimens
Source: PubMed Central journal article supplement (PMC5242262; doi:10.1111/acel.12545), 2016-11-17

**Suppl Fig 2**

**a.**

**Young human liver tissue**

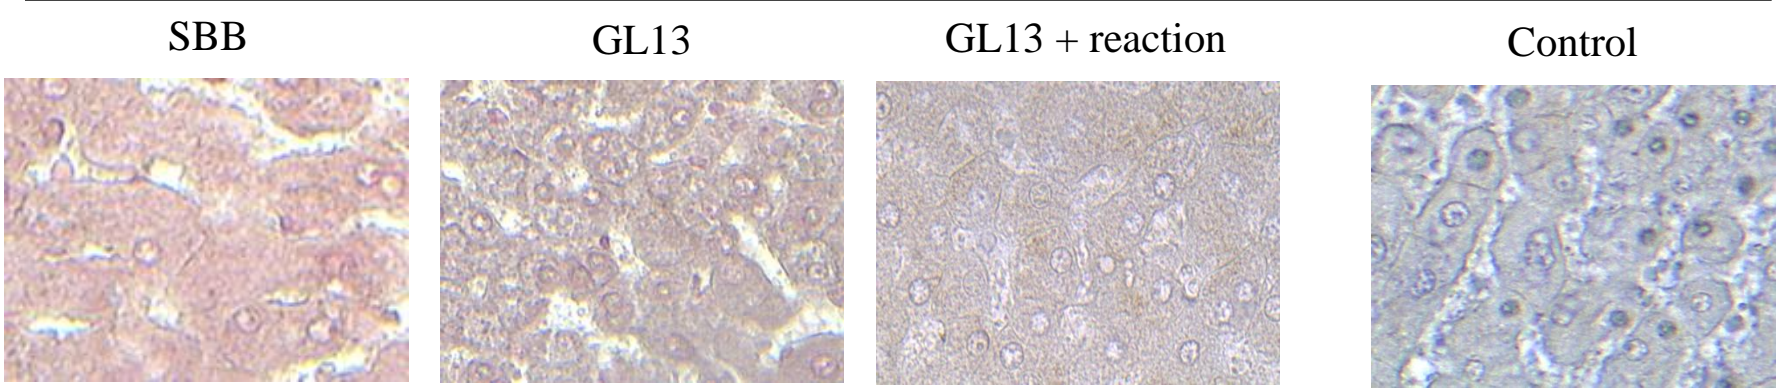

**b.**

**Aged human liver tissue**

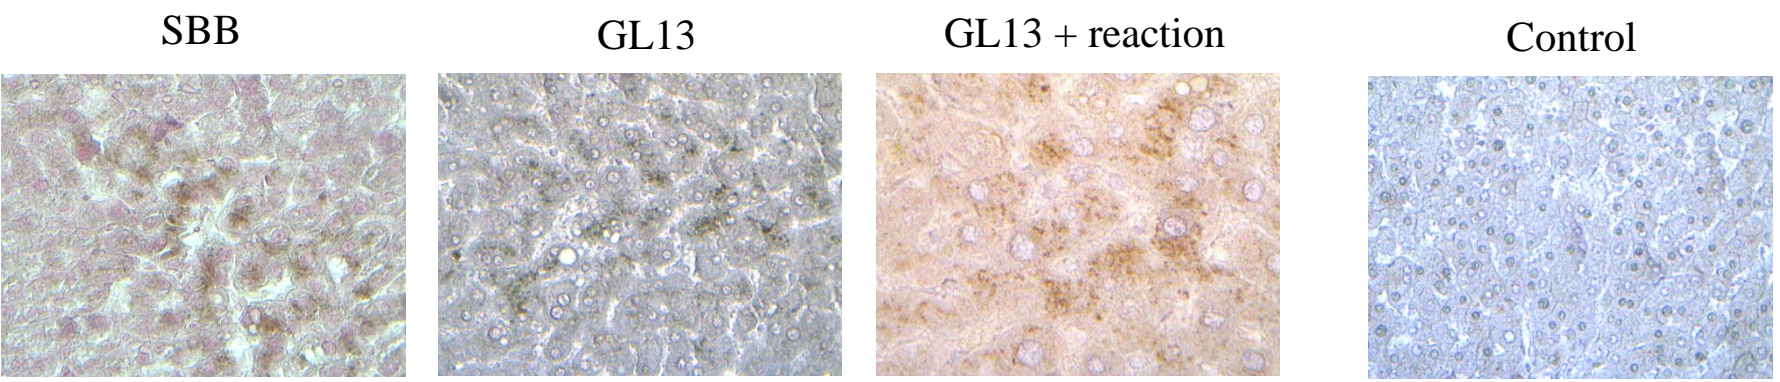

**c.**

**Human seminal vesicle tissue**

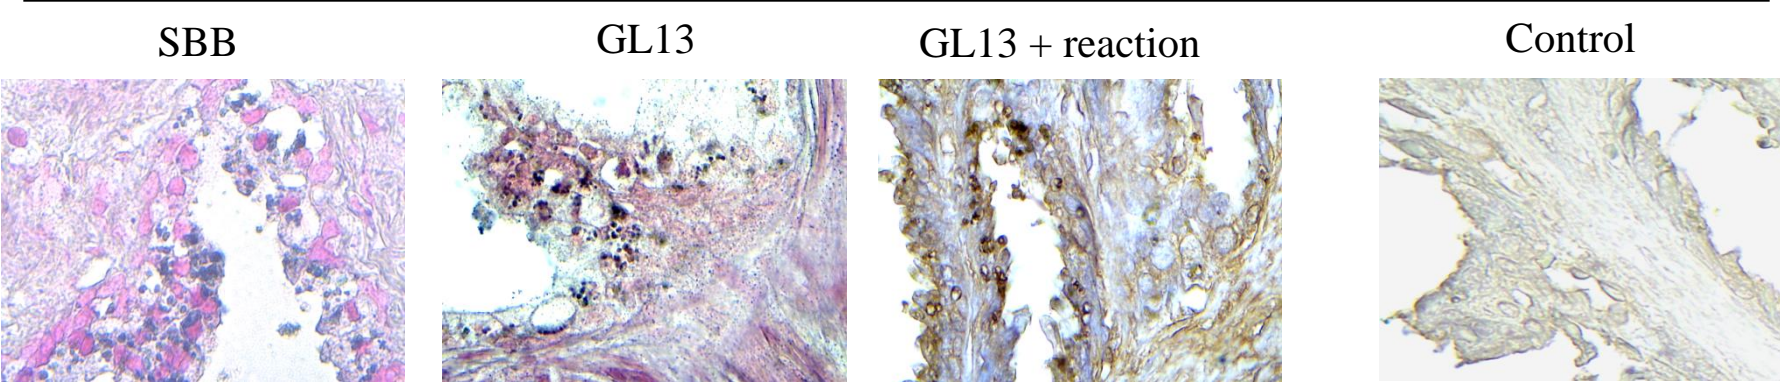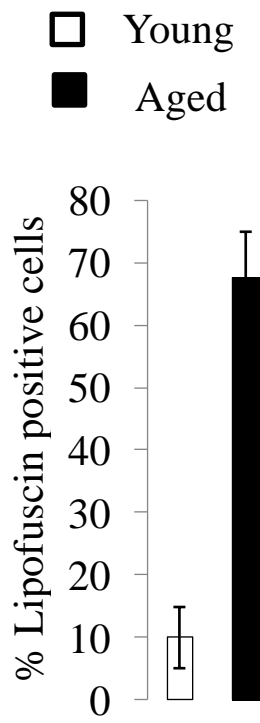

Supplement: ACEL-16-192-s002.pdf [file ACEL-16-192-s002.pdf]
