# Supplementary material for: Robust, universal biomarker assay to detect senescent cells in biological specimens
Source: PubMed Central journal article supplement (PMC5242262; doi:10.1111/acel.12545), 2016-11-17
Supplement: ACEL-16-192-s003.pdf [file ACEL-16-192-s003.pdf]

# Suppl Fig 3

a.

## *In vitro* models

---

| <u><i>Replicative senescence (RS)</i></u>                                                                           | <u><i>Stress Induced Premature Senescence (SISP)</i></u>                                                                  | <u><i>Oncogene Induced Senescence</i></u>                              |
|---------------------------------------------------------------------------------------------------------------------|---------------------------------------------------------------------------------------------------------------------------|------------------------------------------------------------------------|
| 1) Normal human lung diploid fibroblasts<br>( <i>early passage vs late passage</i> )<br>[Georgakopoulou et al 2013] | 2) Normal human lung diploid fibroblasts<br>( <i>irradiated vs non irradiated</i> )<br>[Georgakopoulou et al 2013]        | 5) U2OS hCdt1 Tet-ON<br>( <i>OFF and ON</i> )<br>[Lionto set al 2007]  |
|                                                                                                                     | 3) Saos2-p53 Tet-ON<br>( <i>OFF and ON</i> )<br>[Georgakopoulou et al 2013]                                               | 6) U2OS E2F1-ER<br>( <i>OFF and ON</i> )<br>[Liontos et al 2009]       |
|                                                                                                                     | 4) Saos2-p21 <sup>WAF1/Cip1</sup> Tet-ON<br>( <i>OFF and ON</i> )<br>[Georgakopoulou et al 2013]<br>[Galanos et al, 2016] | 7) HBECs-Cdc6 Tet-ON<br>( <i>OFF and ON</i> )<br>[Petrakis et al 2016] |

b.

## *In vivo* models

---

| <u><i>Clinical samples</i></u>                                                                      | <u><i>Animal models</i></u>                                                        | <u><i>Non-aged, Aged and control tissues</i></u>      |
|-----------------------------------------------------------------------------------------------------|------------------------------------------------------------------------------------|-------------------------------------------------------|
| 1) Head and Neck tumor tissues<br>( <i>irradiated vs non irradiated</i> )<br>[Evangelou et al 2013] | 1) Mouse model expressing<br>conditionally <i>K-rasV12</i><br>[Collado et al 2005] | 1) Human liver tissue<br>from young and aged patients |
| 2) Breast tissues<br>( <i>irradiated vs non irradiated</i> )<br>[Liakou et al 2013]                 | 2) Mouse model of bleomycin<br>induced pneumopathy<br>[Le et al 2010]              | 2) Human seminal vesicles<br>[Evangelou et al 2013]   |
| 3) Congenital nevi vs normal skin<br>[Michaloglou et al 2005]                                       | 3) Palbociclib treated mouse tumor<br>melanoma xenograft<br>[Yoshida et al 2016]   |                                                       |
