# Supplementary material for: Robust, universal biomarker assay to detect senescent cells in biological specimens
Source: PubMed Central journal article supplement (PMC5242262; doi:10.1111/acel.12545), 2016-11-17

# Suppl Fig 4

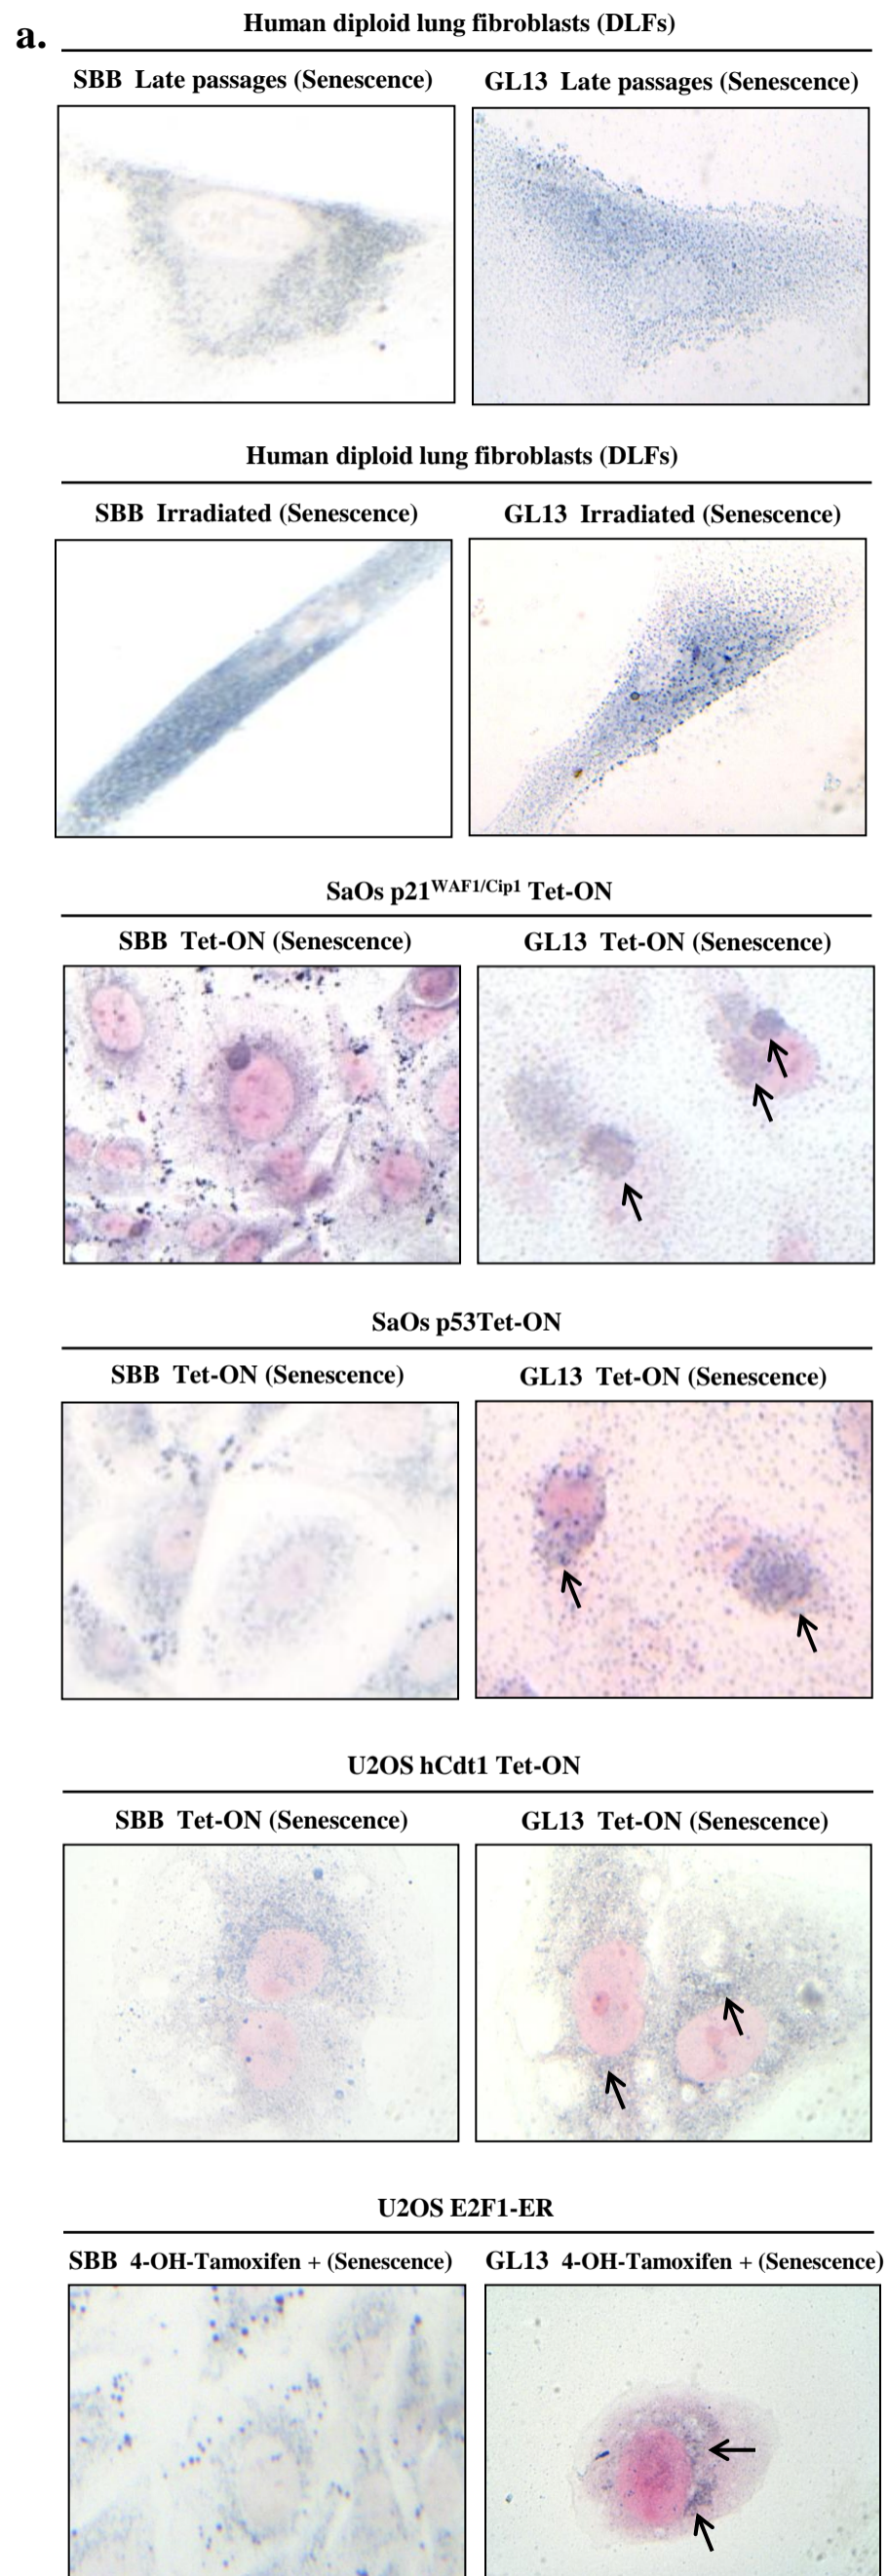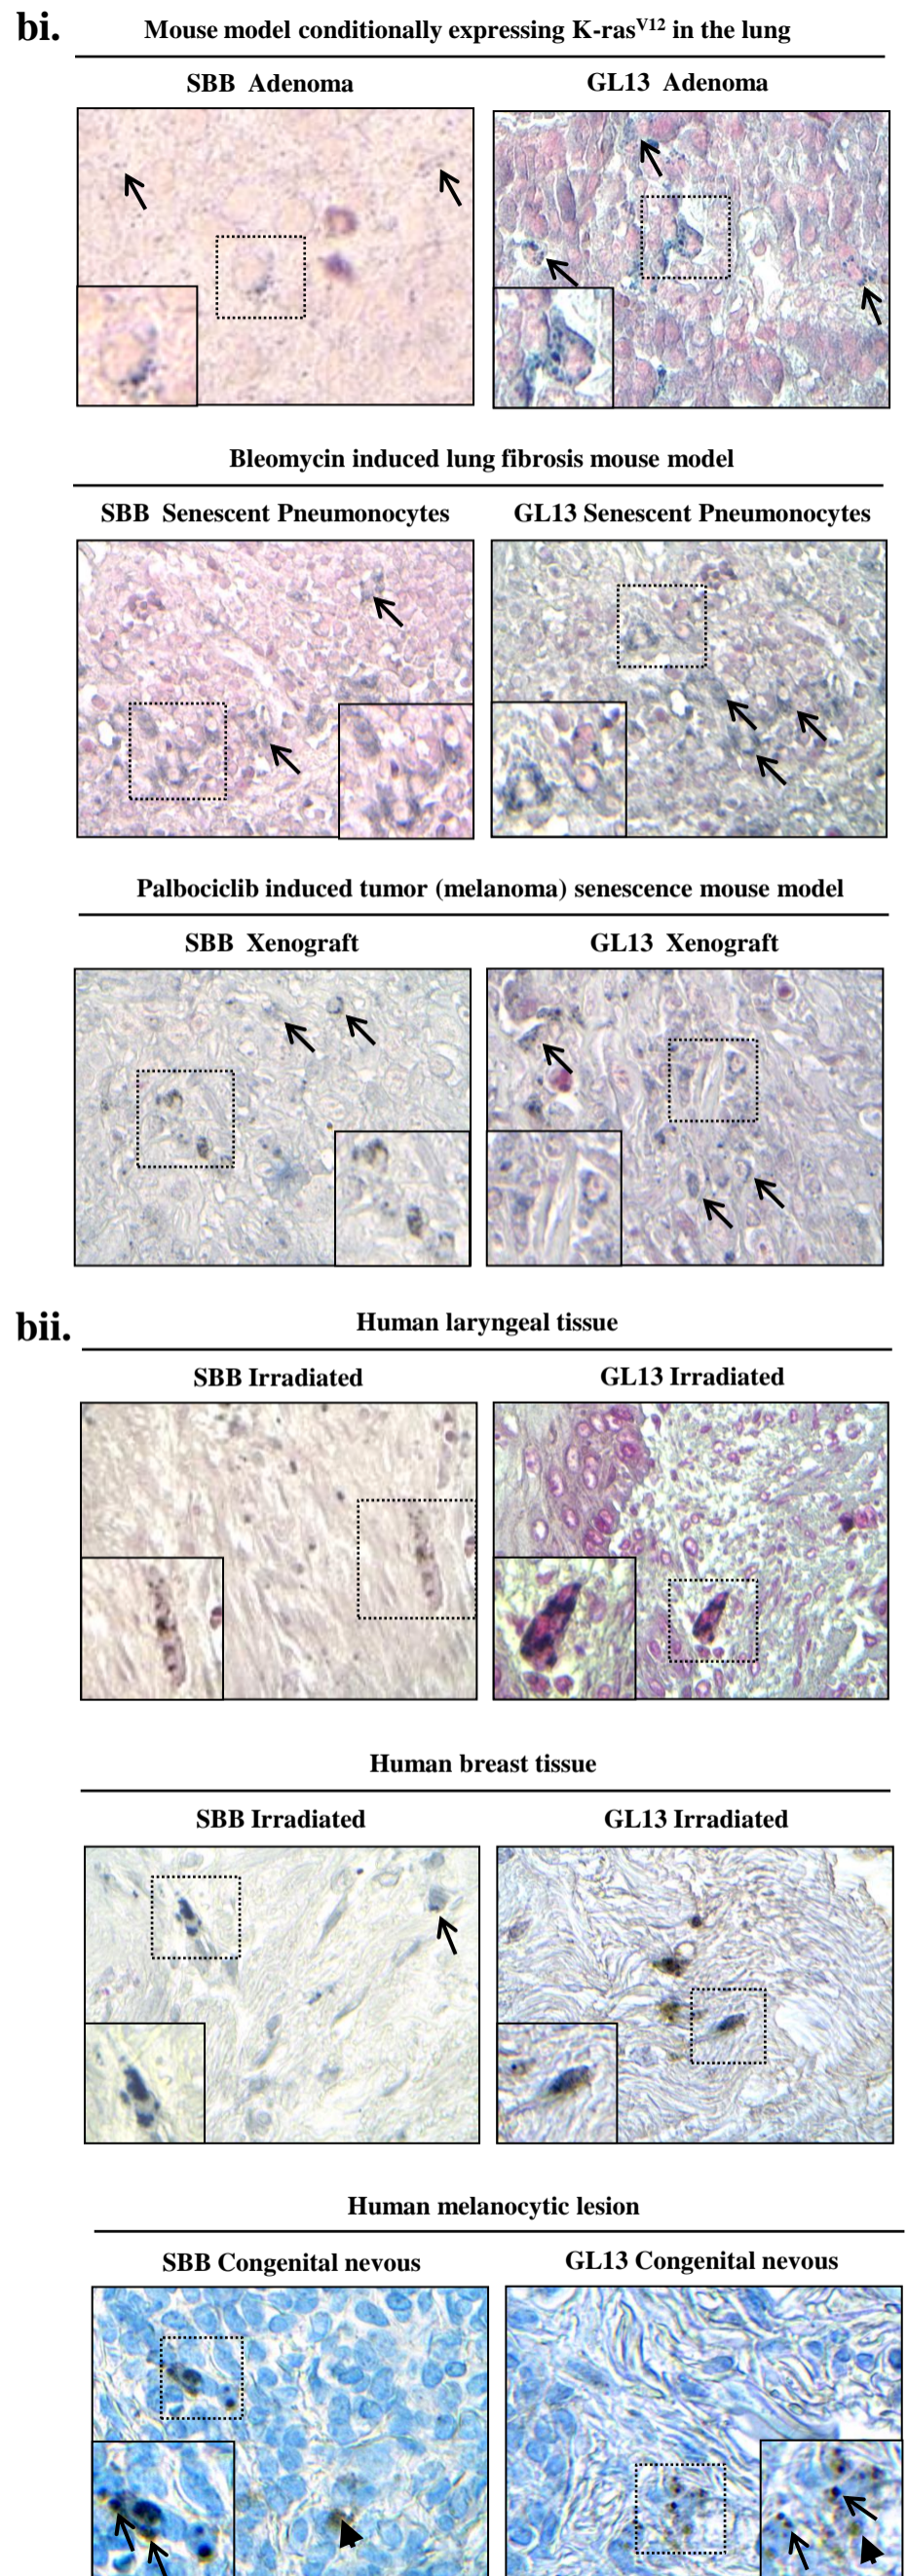

Supplement: ACEL-16-192-s004.pdf [file ACEL-16-192-s004.pdf]
