# Supplementary material for: Robust, universal biomarker assay to detect senescent cells in biological specimens
Source: PubMed Central journal article supplement (PMC5242262; doi:10.1111/acel.12545), 2016-11-17

Suppl Fig 5

a.

Double staining: **Ki67 (DAB) - / SBB-Analogue-Biotin-mediated IHC –BCIP/NBT + (cytoplasmic blue/purple color)**

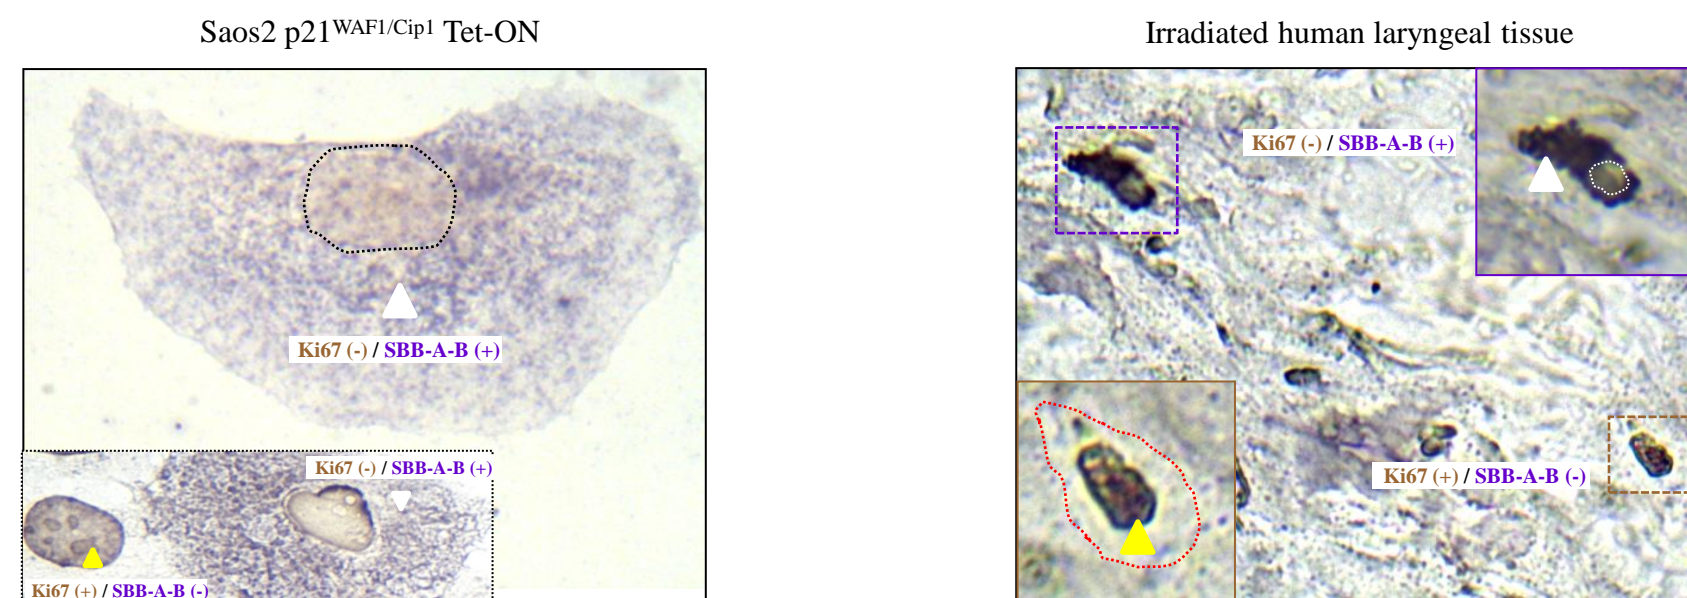

b.

Saos2-p21<sup>WAF1/Cip1</sup> Tet-ON

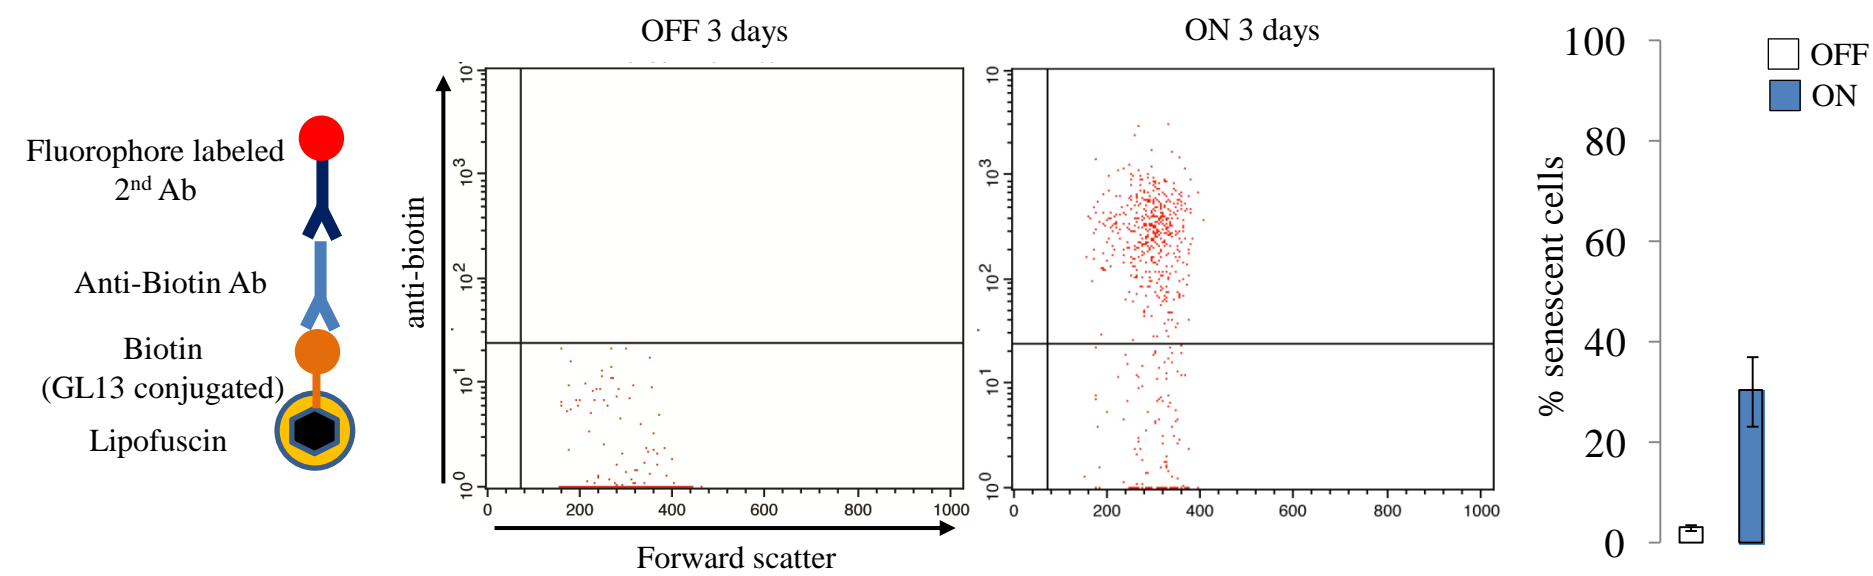

c.

U2OS-Cdt1 Tet-ON (8days)

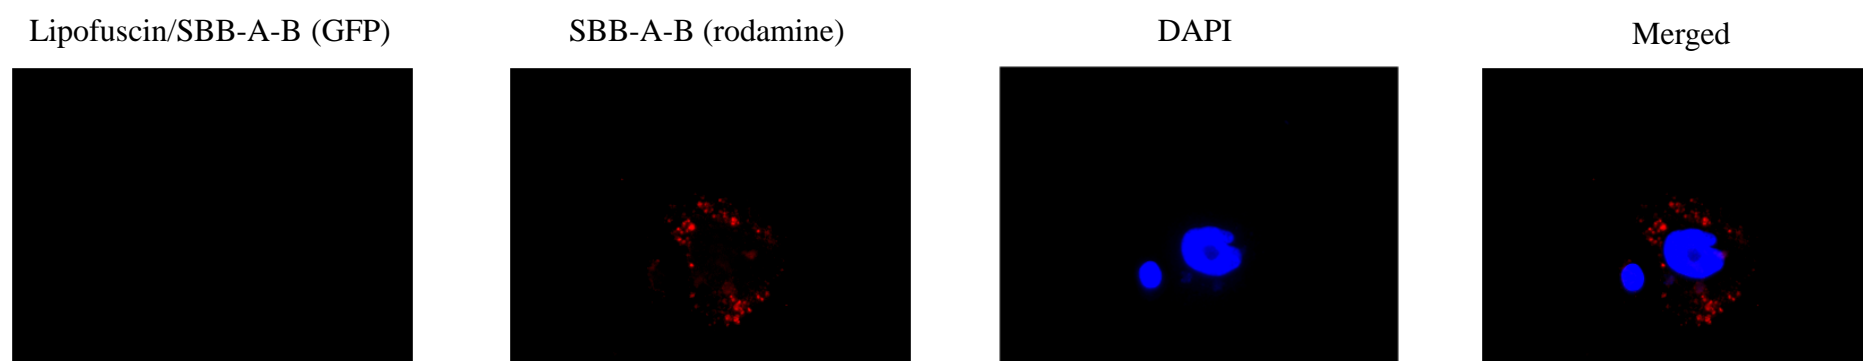

d.

HeLa

Li-Fraumeni

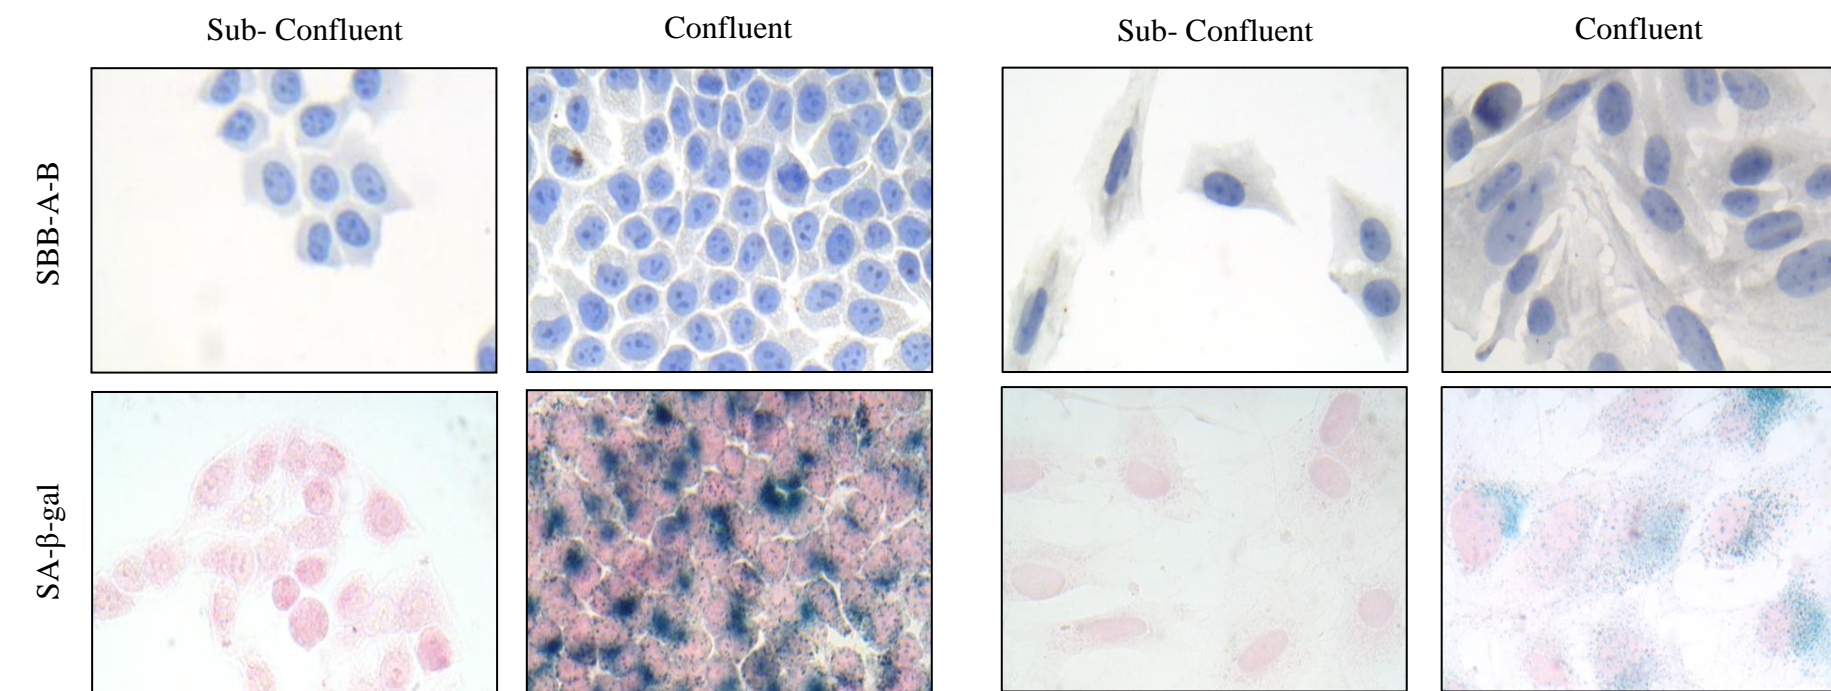

e.

HeLa

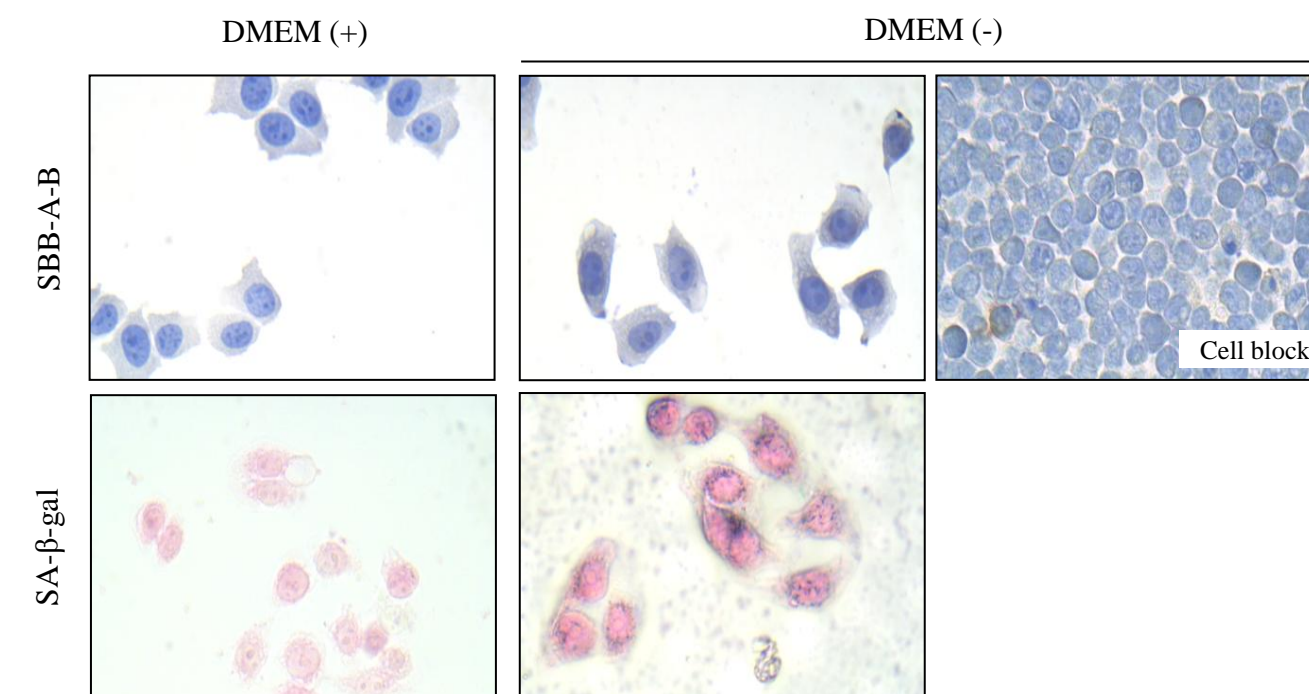

Supplement: ACEL-16-192-s005.pdf [file ACEL-16-192-s005.pdf]
